# Supplementary material
Source: publisher figshare collection journal article supplement (https://springernature.figshare.com/ndownloader/files/17297450)
Supplement: Supplementary file [file 17297450]

## **Additional Figures & Tables**

**Additional Fig. S1** An example of 1937 aerial photography that was compared with present-day satellite imagery, then cross-referenced with interviews and archival documents to verify land-use histories. Historic aerial photographs were sourced from local libraries

**Additional Fig. S2** The association of yard management with soil C pools over time since residential development to 40-cm depth. Points represent the mean of three cores per yard. Shading is the confidence interval of a significant linear mixed-effects model that accounts for pre-development legacies. Solid black lines show a significant trend when a shared y-intercept is assumed, and the dashed line a non-significant trend across all yards

**Additional Table S1.** Soil texture across clusters (LUC) of yards, mown fields, and forests

**Additional Table S2.** Differences in present land use soil properties integrated over depths after accounting for pre-development legacies

**Additional Table S3.** Present land use effects on soil properties integrated over depths after accounting for pre-development legacies

**Additional Table S4.** Time since development and yard management effects on soil properties after accounting for pre-development legacies

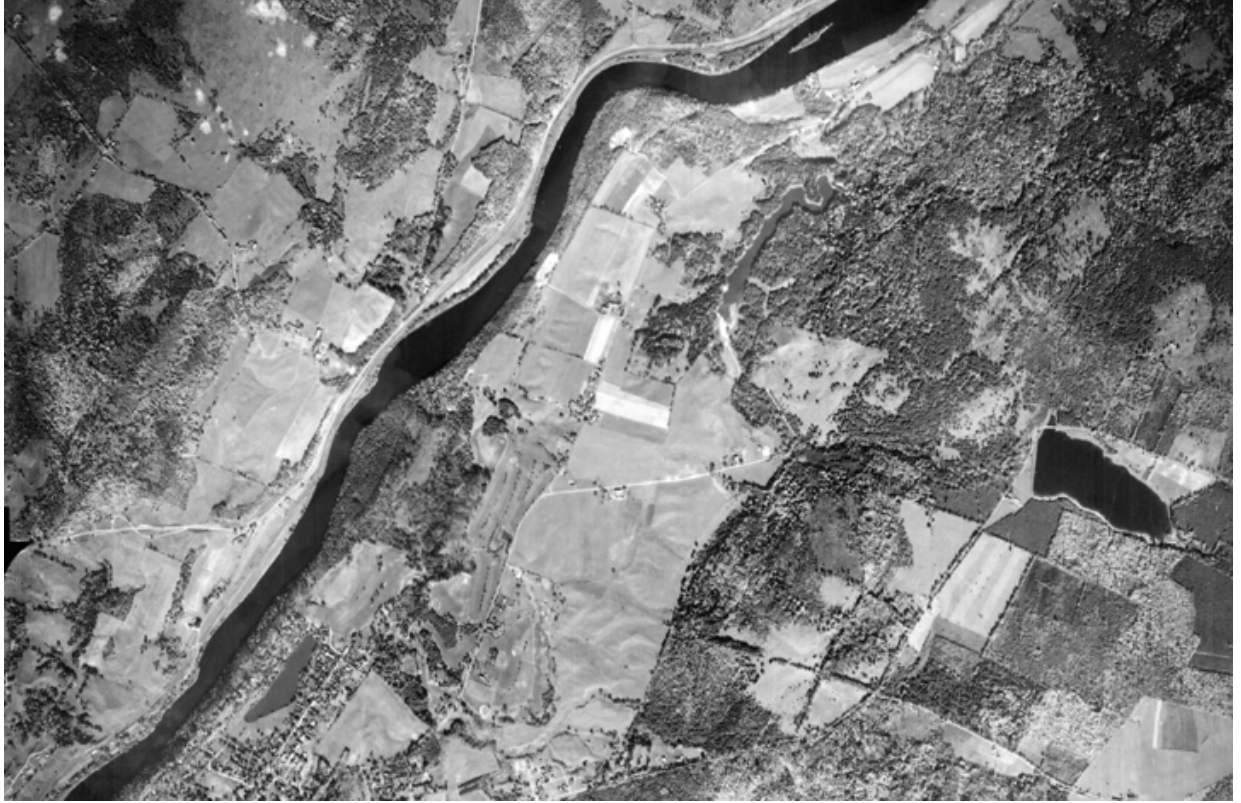

**Additional Fig. S1** An example of 1937 aerial photography that was compared with present-day satellite imagery, then cross-referenced with interviews and archival documents to verify land-use histories. Historic aerial photographs were sourced from local libraries.

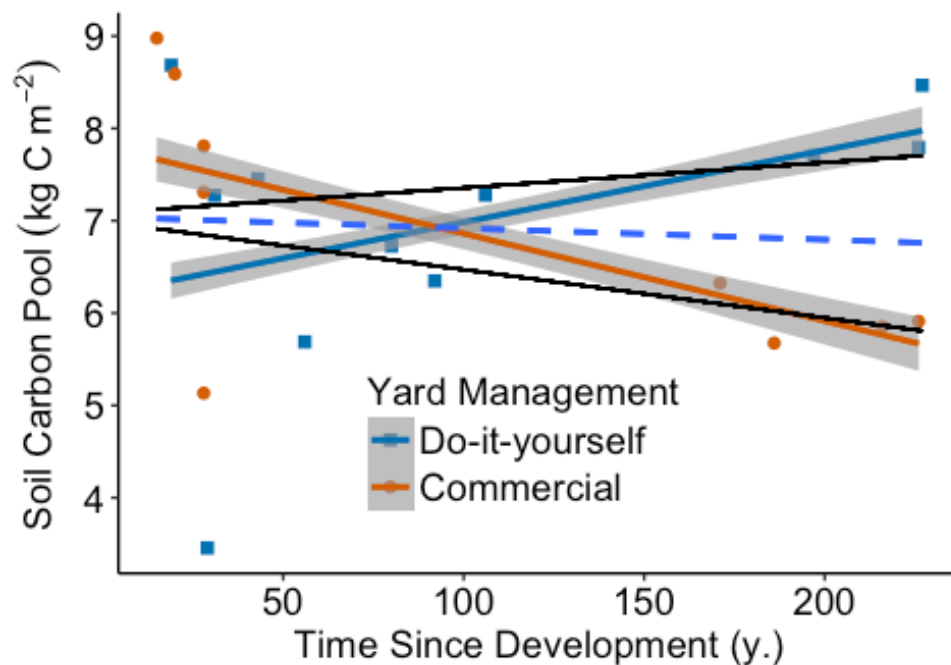

**Additional Fig. S2** The association of yard management with soil C pools over time since residential development to 40-cm depth. Points represent the mean of three cores per yard. Shading is the confidence interval of a significant linear mixed-effects model that accounts for pre-development legacies. Solid black lines show a significant trend when a shared y-intercept is assumed, and the dashed line a non-significant trend across all yards.

**Additional Table S1. Soil texture across clusters (LUC) of yards, mown fields, and forests**

| LUC | Soil series                         | Texture                   | Parent material                      |
|-----|-------------------------------------|---------------------------|--------------------------------------|
| 1   | Ninigret/Dummerston                 | fine sandy loam           | gneiss, granite, schist, or phyllite |
| 2   | Buckland/Vershire-Dummerston        | loam/coarse loam          | mica, schist, limestone or phyllite  |
| 3   | Buckland/Glover-Vershire            | loam                      | mica, schist, limestone or phyllite  |
| 4   | Buckland                            | loam                      | mica, schist, limestone or phyllite  |
| 5   | Vershire-Dummerston                 | coarse loam               | mica, schist, limestone or phyllite  |
| 6   | Buckland/Glover-Vershire-Dummerston | loam                      | mica, schist, limestone or phyllite  |
| 7   | Buckland/Vershire-Dummerston        | loam                      | mica, schist, limestone or phyllite  |
| 8   | Groveton                            | fine sandy loam           | granite, gneiss or schist            |
| 9   | Vershire-Dummerston                 | coarse loam               | mica, schist, limestone or phyllite  |
| 10  | Agawam                              | fine sandy loam           | gneiss, granite, schist, or phyllite |
| 11  | Hitchcock/Charlton                  | silt loam/fine sandy loam | granite, gneiss, or schist           |
| 12  | Glover-Vershire/Hinckley            | coarse loam/sandy loam    | mica, schist, limestone or phyllite  |

**Additional Table S2. Differences in present land use soil properties integrated over depths after accounting for pre-development legacies**

| Response     | Depth (cm) | Land Use Contrast | Estimate | SE   | df <sup>★</sup> | <i>t</i> ratio | <i>p</i> -value |
|--------------|------------|-------------------|----------|------|-----------------|----------------|-----------------|
| Soil C Pool  | 0-20       | Yard - Field      | -0.90    | 0.31 | 30.1            | -2.9           | 0.02            |
|              |            | Yard - Forest     | -0.91    | 0.32 | 30.7            | -2.9           | 0.02            |
|              |            | Field - Forest    | -0.007   | 0.34 | 29.1            | -0.02          | 0.9             |
|              | 0-40       | Yard - Field      | -1.60    | 0.41 | 31.3            | -3.9           | 0.001           |
|              |            | Yard - Forest     | -1.46    | 0.43 | 31.6            | -3.4           | 0.005           |
|              |            | Field - Forest    | 0.14     | 0.46 | 30.6            | 0.3            | 0.9             |
|              | 0-60       | Yard - Field      | -1.4     | 0.63 | 28.8            | -2.2           | 0.09            |
|              |            | Yard - Forest     | -1.8     | 0.65 | 29.2            | -2.7           | 0.03            |
|              |            | Field - Forest    | -0.4     | 0.70 | 26.9            | -0.6           | 0.8             |
| Soil N Pool  | 0-20       | Yard - Field      | -0.06    | 0.03 | 30.1            | -2.16          | 0.09            |
|              |            | Yard - Forest     | 0.03     | 0.03 | 31.6            | 0.98           | 0.59            |
|              |            | Field - Forest    | 0.09     | 0.04 | 28.95           | 2.82           | 0.02            |
|              | 0-40       | Yard - Field      | -0.13    | 0.04 | 31.7            | -2.9           | 0.02            |
|              |            | Yard - Forest     | 0.003    | 0.04 | 32.6            | 0.06           | 0.99            |
|              |            | Field - Forest    | 0.13     | 0.05 | 30.7            | 2.7            | 0.03            |
|              | 0-60       | Yard - Field      | -0.11    | 0.05 | 28.9            | -2.1           | 0.10            |
|              |            | Yard - Forest     | -0.01    | 0.05 | 29.3            | -0.26          | 0.96            |
|              |            | Field - Forest    | 0.09     | 0.05 | 26.8            | 1.74           | 0.21            |
| Soil C/N     | 0-20       | Yard - Field      | 0.28     | 0.65 | 42              | 0.4            | 0.9             |
|              |            | Yard - Forest     | -2.98    | 0.67 | 42              | -4.4           | 0.0002          |
|              |            | Field - Forest    | -3.3     | 0.74 | 42              | -4.4           | 0.0002          |
|              | 0-40       | Yard - Field      | 2.8      | 1.65 | 42              | 1.7            | 0.2             |
|              |            | Yard - Forest     | 0.07     | 1.7  | 42              | 0.04           | 0.9             |
|              |            | Field - Forest    | -2.7     | 1.9  | 42              | -1.4           | 0.3             |
|              | 0-60       | Yard - Field      | 1.9      | 1.3  | 28.7            | 1.4            | 0.3             |
|              |            | Yard - Forest     | 0.01     | 1.37 | 29.7            | 0.008          | 1               |
|              |            | Field - Forest    | -1.9     | 1.4  | 26              | -1.4           | 0.4             |
| Bulk Density | 0-20       | Yard - Field      | 0.19     | 0.05 | 42              | 3.7            | 0.002           |
|              |            | Yard - Forest     | 0.38     | 0.05 | 42              | 7.2            | <0.0001         |
|              |            | Field - Forest    | 0.19     | 0.06 | 42              | 3.4            | 0.005           |
|              | 0-40       | Yard - Field      | 0.14     | 0.05 | 29.0            | 2.6            | 0.04            |
|              |            | Yard - Forest     | 0.32     | 0.06 | 30.5            | 5.8            | <0.0001         |
|              |            | Field - Forest    | 0.18     | 0.06 | 27.8            | 3.0            | 0.01            |
|              | 0-60       | Yard - Field      | 0.03     | 0.05 | 27.8            | 0.7            | 0.79            |
|              |            | Yard - Forest     | 0.20     | 0.05 | 28.4            | 3.7            | 0.002           |
|              |            | Field - Forest    | 0.17     | 0.05 | 25.6            | 3.1            | 0.01            |

<sup>★</sup>degrees of freedom by Satterthwaite approximations. Contrasts of the model: response ~ land use + (1 | land-use cluster) with Tukey adjustment of *p*-values. Bulk density and soil C/N are averaged over depth increments.

**Additional Table S3. Present land use effects on soil properties integrated over depths after accounting for pre-development legacies**

| Response     | Depth (cm) | <i>F</i> value (df <sup>†</sup> ) | <i>p</i> -value | marginal $r^2$ <sup>†</sup> | conditional $r^2$ <sup>†</sup> |
|--------------|------------|-----------------------------------|-----------------|-----------------------------|--------------------------------|
| Soil C Pool  | 0-20       | 6.1 (2, 30)                       | 0.006           | 0.18                        | 0.34                           |
|              | 0-40       | 9.6 (2, 31.2)                     | 0.0005          | 0.23                        | 0.5                            |
|              | 0-60       | 4.3 (2, 28.2)                     | 0.02            | 0.13                        | 0.43                           |
| Soil N Pool  | 0-20       | 4.3 (2, 30.3)                     | 0.02            | 0.16                        | 0.18                           |
|              | 0-40       | 5.1 (2, 31.7)                     | 0.01            | 0.17                        | 0.25                           |
|              | 0-60       | 2.5 (2, 28.3)                     | 0.097           | 0.08                        | 0.34                           |
| Soil C/N     | 0-20       | 12.5 (2, 42)                      | <0.0001         | 0.36                        | 0.36                           |
|              | 0-40       | 1.6 (2, 42)                       | 0.2             | 0.07                        | 0.07                           |
|              | 0-60       | 1.3 (2, 28.1)                     | 0.3             | 0.05                        | 0.17                           |
| Bulk Density | 0-20       | 26.6 (2, 42)                      | <0.0001         | 0.55                        | 0.55                           |
|              | 0-40       | 17.0 (2, 29.2)                    | <0.0001         | 0.43                        | 0.45                           |
|              | 0-60       | 7.7 (2, 27.2)                     | 0.002           | 0.23                        | 0.44                           |

<sup>†</sup>denominator degrees of freedom by Satterthwaite approximations. Contrasts of the model: response ~ land use + (1 | land-use cluster). Marginal  $r^2$  represent the fixed effect of land use and conditional  $r^2$  include the random effect of land-use cluster. Bulk density and soil C/N are averaged over depths.

**Additional Table S4. Time since development and yard management effects on soil properties after accounting for pre-development legacies**

| Response     | Factor               | <i>F</i> value (df <sup>†</sup> ) | <i>p</i> value | marginal <i>r</i> <sup>2</sup> <sup>†</sup> | conditional <i>r</i> <sup>2</sup> <sup>†</sup> |
|--------------|----------------------|-----------------------------------|----------------|---------------------------------------------|------------------------------------------------|
| Soil C Pool  | Management           | 1.9 (1, 12.6)                     | 0.2            | 0.24                                        | 0.30                                           |
|              | House Age            | 0.04 (1, 58.3)                    | 0.8            |                                             |                                                |
|              | Depth                | 16.5 (1, 65.3)                    | 0.0001         |                                             |                                                |
|              | Management:House Age | 5.4 (1, 12.3)                     | 0.04           |                                             |                                                |
| Soil N Pool  | Management           | 1.5 (1, 12.5)                     | 0.24           | 0.38                                        | 0.43                                           |
|              | House Age            | 1.2 (1, 58.9)                     | 0.28           |                                             |                                                |
|              | Depth                | 39.9 (1, 64.9)                    | <0.0001        |                                             |                                                |
|              | Management:House Age | 5.0 (1, 12.0)                     | 0.04           |                                             |                                                |
| Soil C/N     | Management           | 0.01 (1, 12.0)                    | 0.9            | 0.18                                        | 0.22                                           |
|              | House Age            | 8.8 (1, 67.4)                     | 0.004          |                                             |                                                |
|              | Depth                | 12.1 (1, 61.5)                    | 0.0009         |                                             |                                                |
|              | Management:House Age | 0.5 (1, 11.2)                     | 0.49           |                                             |                                                |
| Bulk Density | Management           | 0.36 (1, 9.1)                     | 0.56           | 0.13                                        | 0.20                                           |
|              | House Age            | 3.8 (1, 54.0)                     | 0.06           |                                             |                                                |
|              | Depth                | 0.08 (1, 62.9)                    | 0.77           |                                             |                                                |
|              | Management:House Age | 3.7 (1, 8.9)                      | 0.09           |                                             |                                                |

<sup>†</sup>degrees of freedom by Satterthwaite approximations. Marginal *r*<sup>2</sup> represent the fixed effect of land use and conditional *r*<sup>2</sup> include the random effect of land-use cluster. Yards were either mown weekly and clippings exported (n = 9) or mown bimonthly to monthly and clippings remained (n = 11). Results from model: response ~ house age\*management + depth + (1 | land-use cluster). House age was a proxy for time since development.
